# Supplementary material for: Chemical activation of MgH2; a new route to superior hydrogen storage materials
Source: Royal Society of Chemistry journal article supplement (doi:10.1039/b503085d), 2005-01-01
Supplement: b503085d.pdf [file b503085d.pdf]

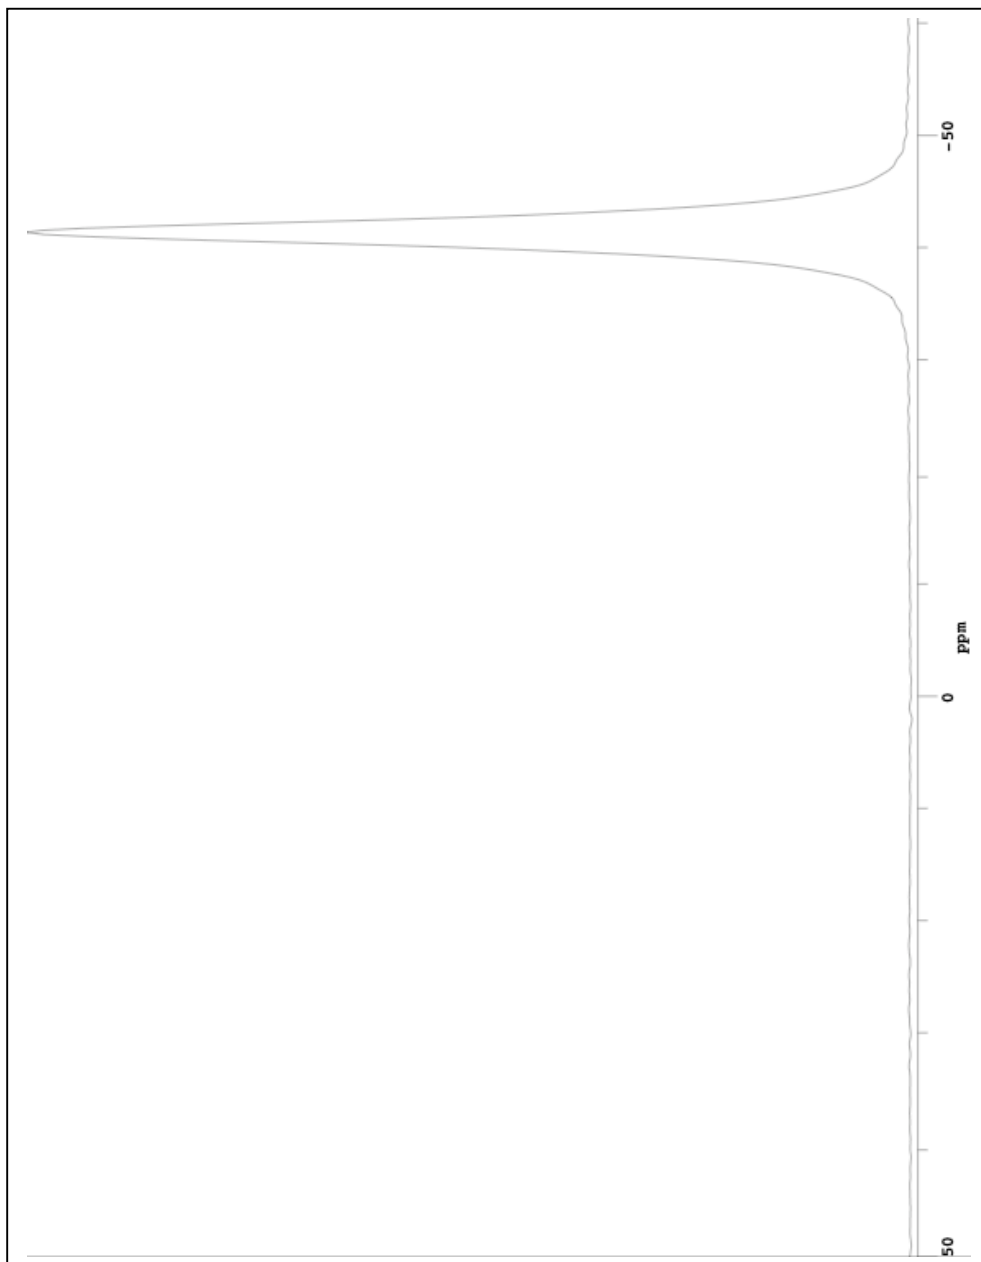

Solid-state  $^{11}\text{B}$  NMR spectra of  $\text{MgH}_2 + (0.1) \text{LiBH}_4$  heated in a sealed evacuated quartz tube at  $300\text{ }^\circ\text{C}$  for 12 hours.

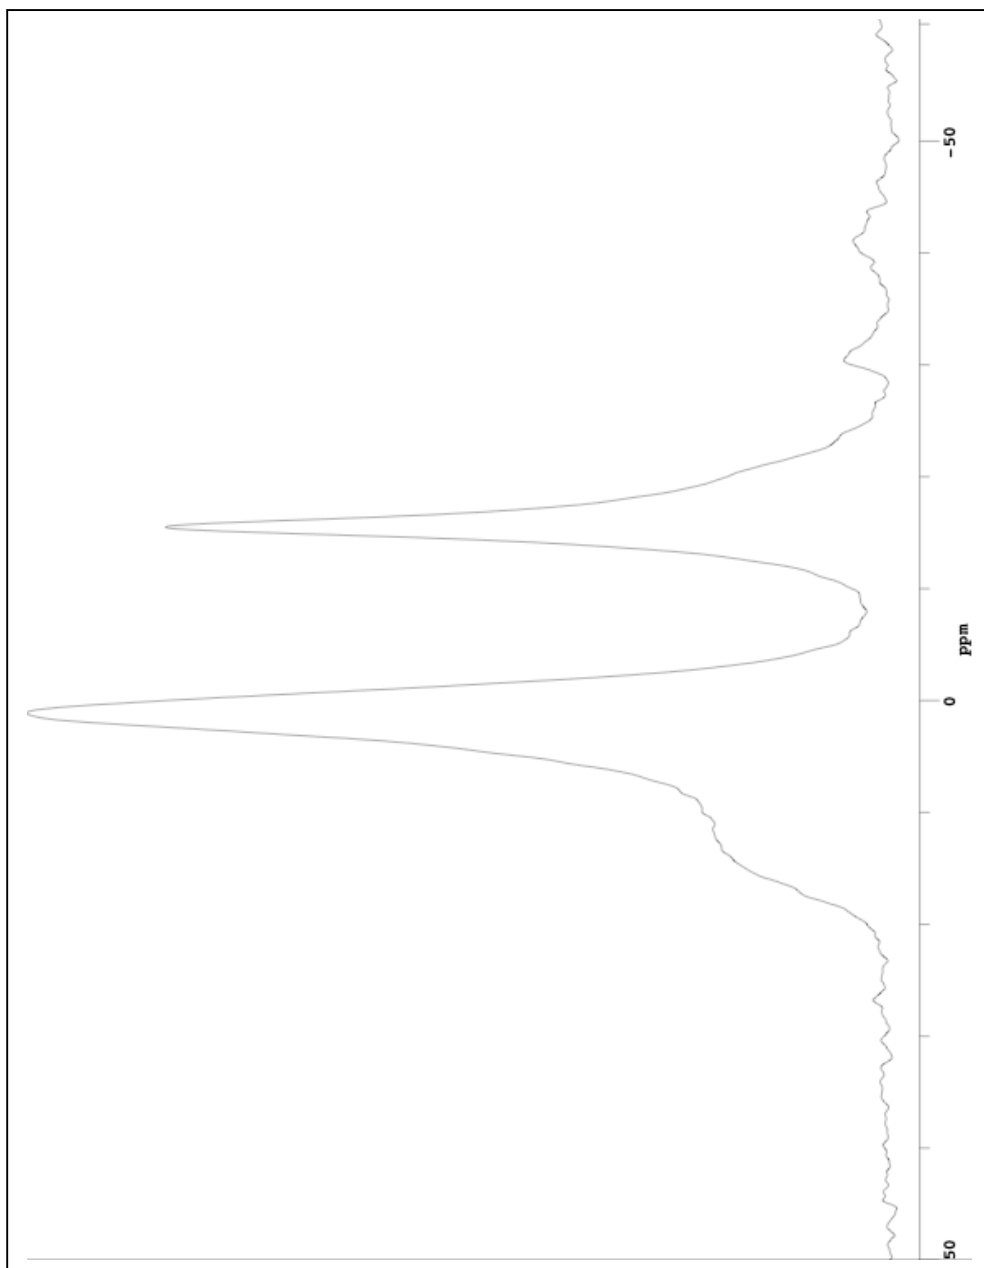

Solid-state  $^{11}\text{B}$  NMR spectra of  $\text{MgH}_2 + (0.1) \text{LiBH}_4$  heated in a sealed evacuated quartz tube at  $300\text{ }^\circ\text{C}$  for 12 hours after the 6<sup>th</sup> hydrogen adsorption.

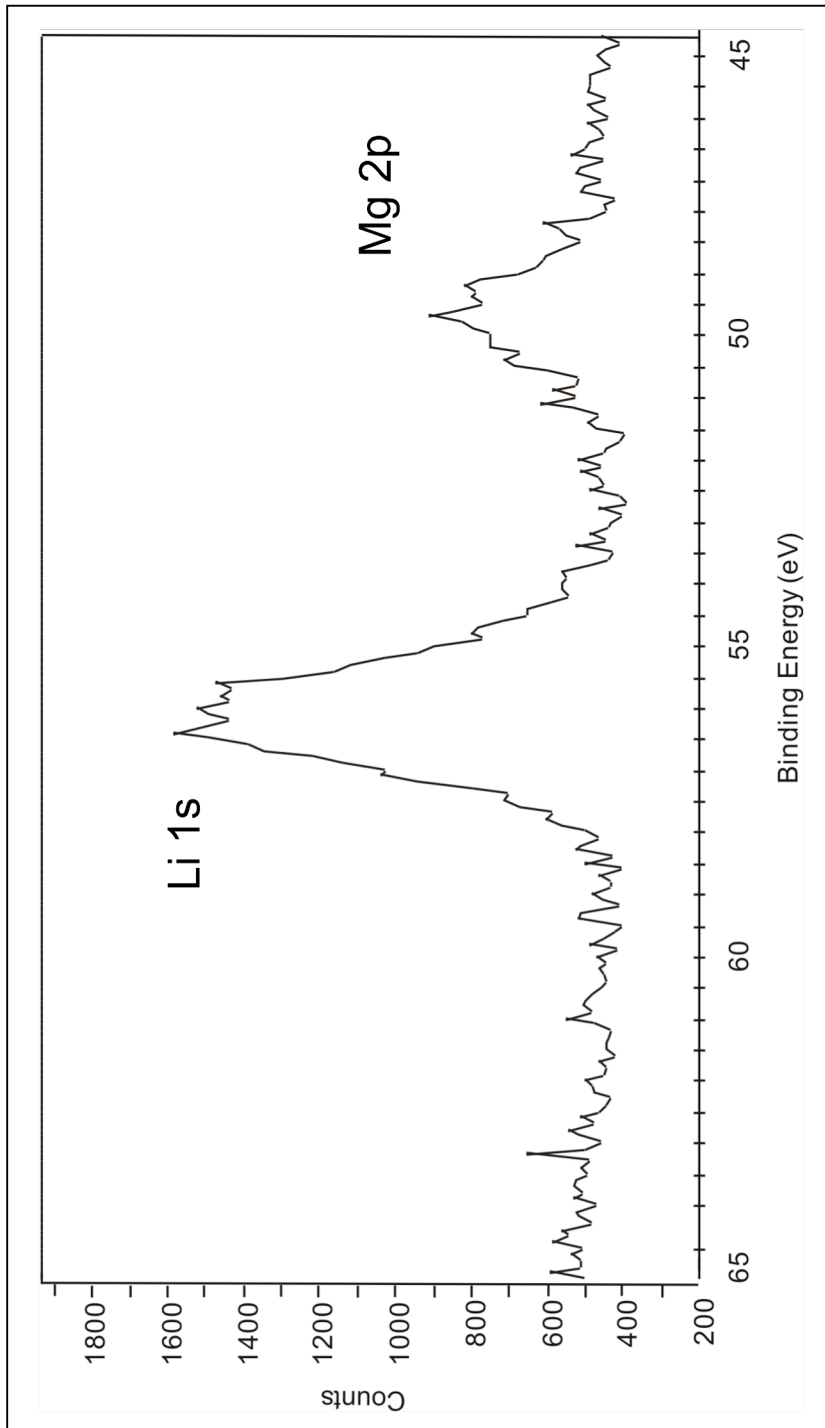

XPS spectra of  $\text{MgH}_2 + (0.1) \text{LiBH}_4$  heated in a sealed evacuated quartz tube at  $300^\circ\text{C}$  for 12 hours after the 6<sup>th</sup> hydrogen adsorption.

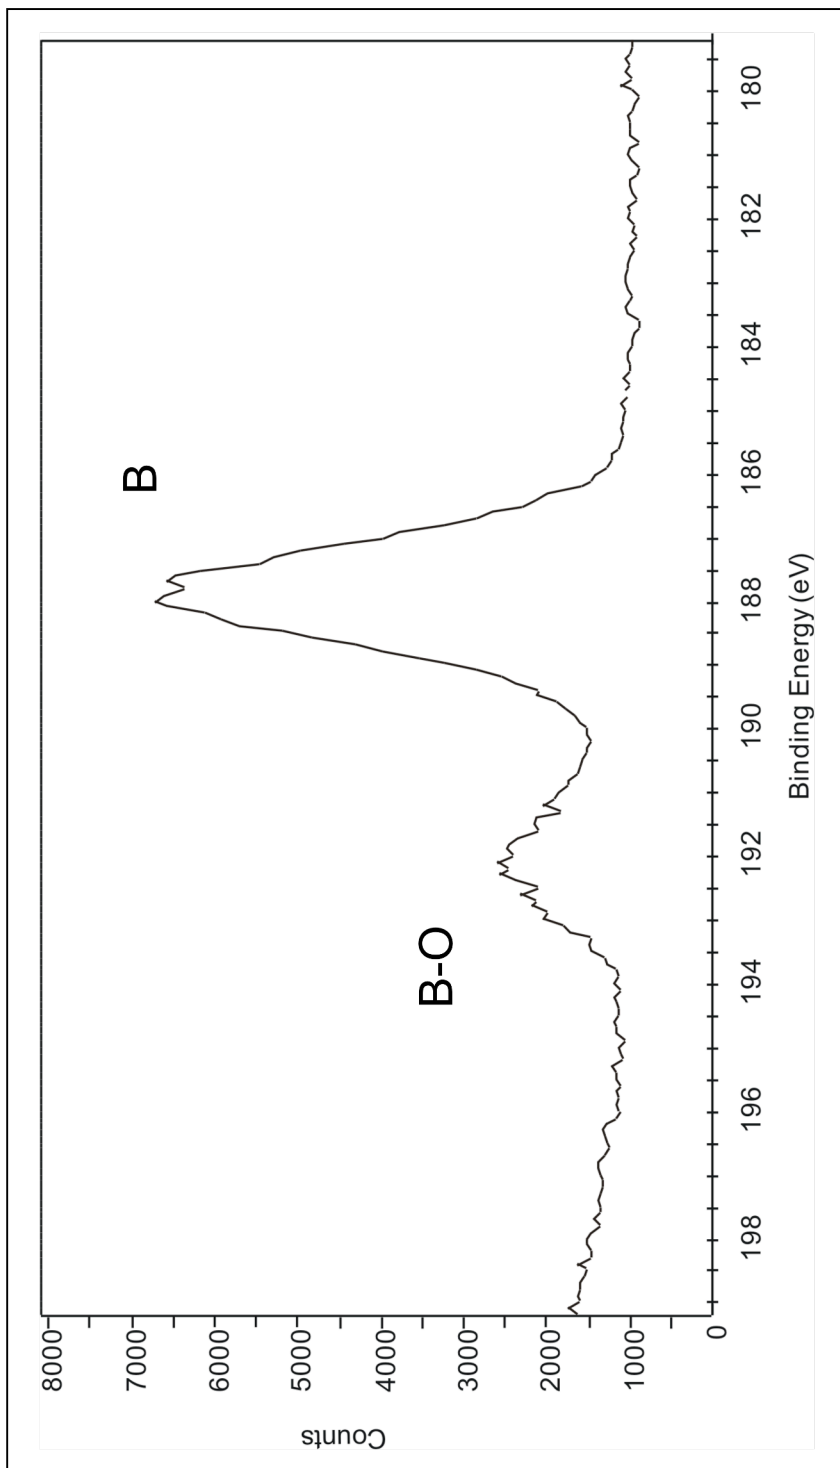

XPS spectra of  $\text{MgH}_2 + (0.1) \text{LiBH}_4$  heated in a sealed evacuated quartz tube at  $300\text{ }^\circ\text{C}$  for 12 hours after the 6<sup>th</sup> hydrogen adsorption.
